# Supplementary material
Source: PubMed Central journal article supplement (PMC4318885)

**Supplemental Figure 1. Cellular localization of NCATc2 in MIN6 cells.** Cellular localization by immunofluorescent staining of NFATc2 in MIN6 cells after 60 min exposure to 16.7 mM glucose and 20 nM GLP-1. DAPI fluorescent staining was used to identify the nuclear compartment of MIN6 cells. Micrographs were merged by Image J software (NIH Bethesda).

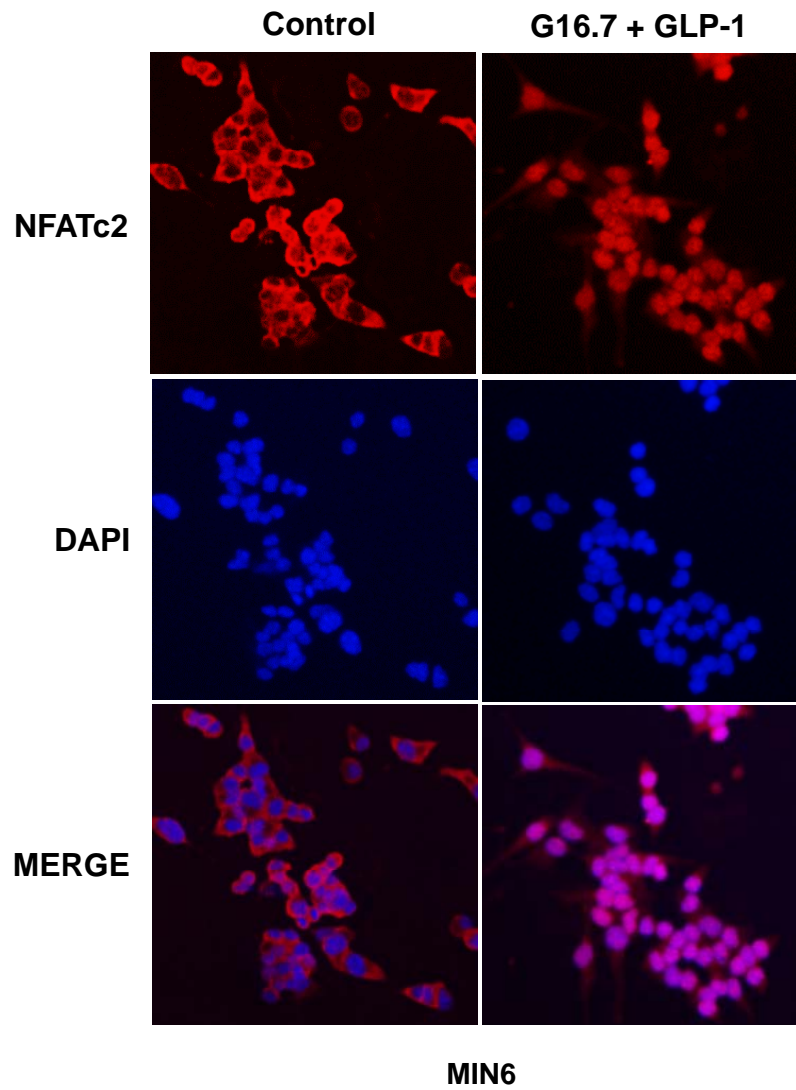

Supplement: me-14-1066.pdf [file me-14-1066.pdf]
